# Supplementary material for: The genome of stress tolerant crop wild relative Paspalum vaginatum leads to increased biomass productivity in the crop Zea mays
Source: bioRxiv or medRxiv preprint supplement (doi:10.1101/2021.08.18.456832), 2021-08-19

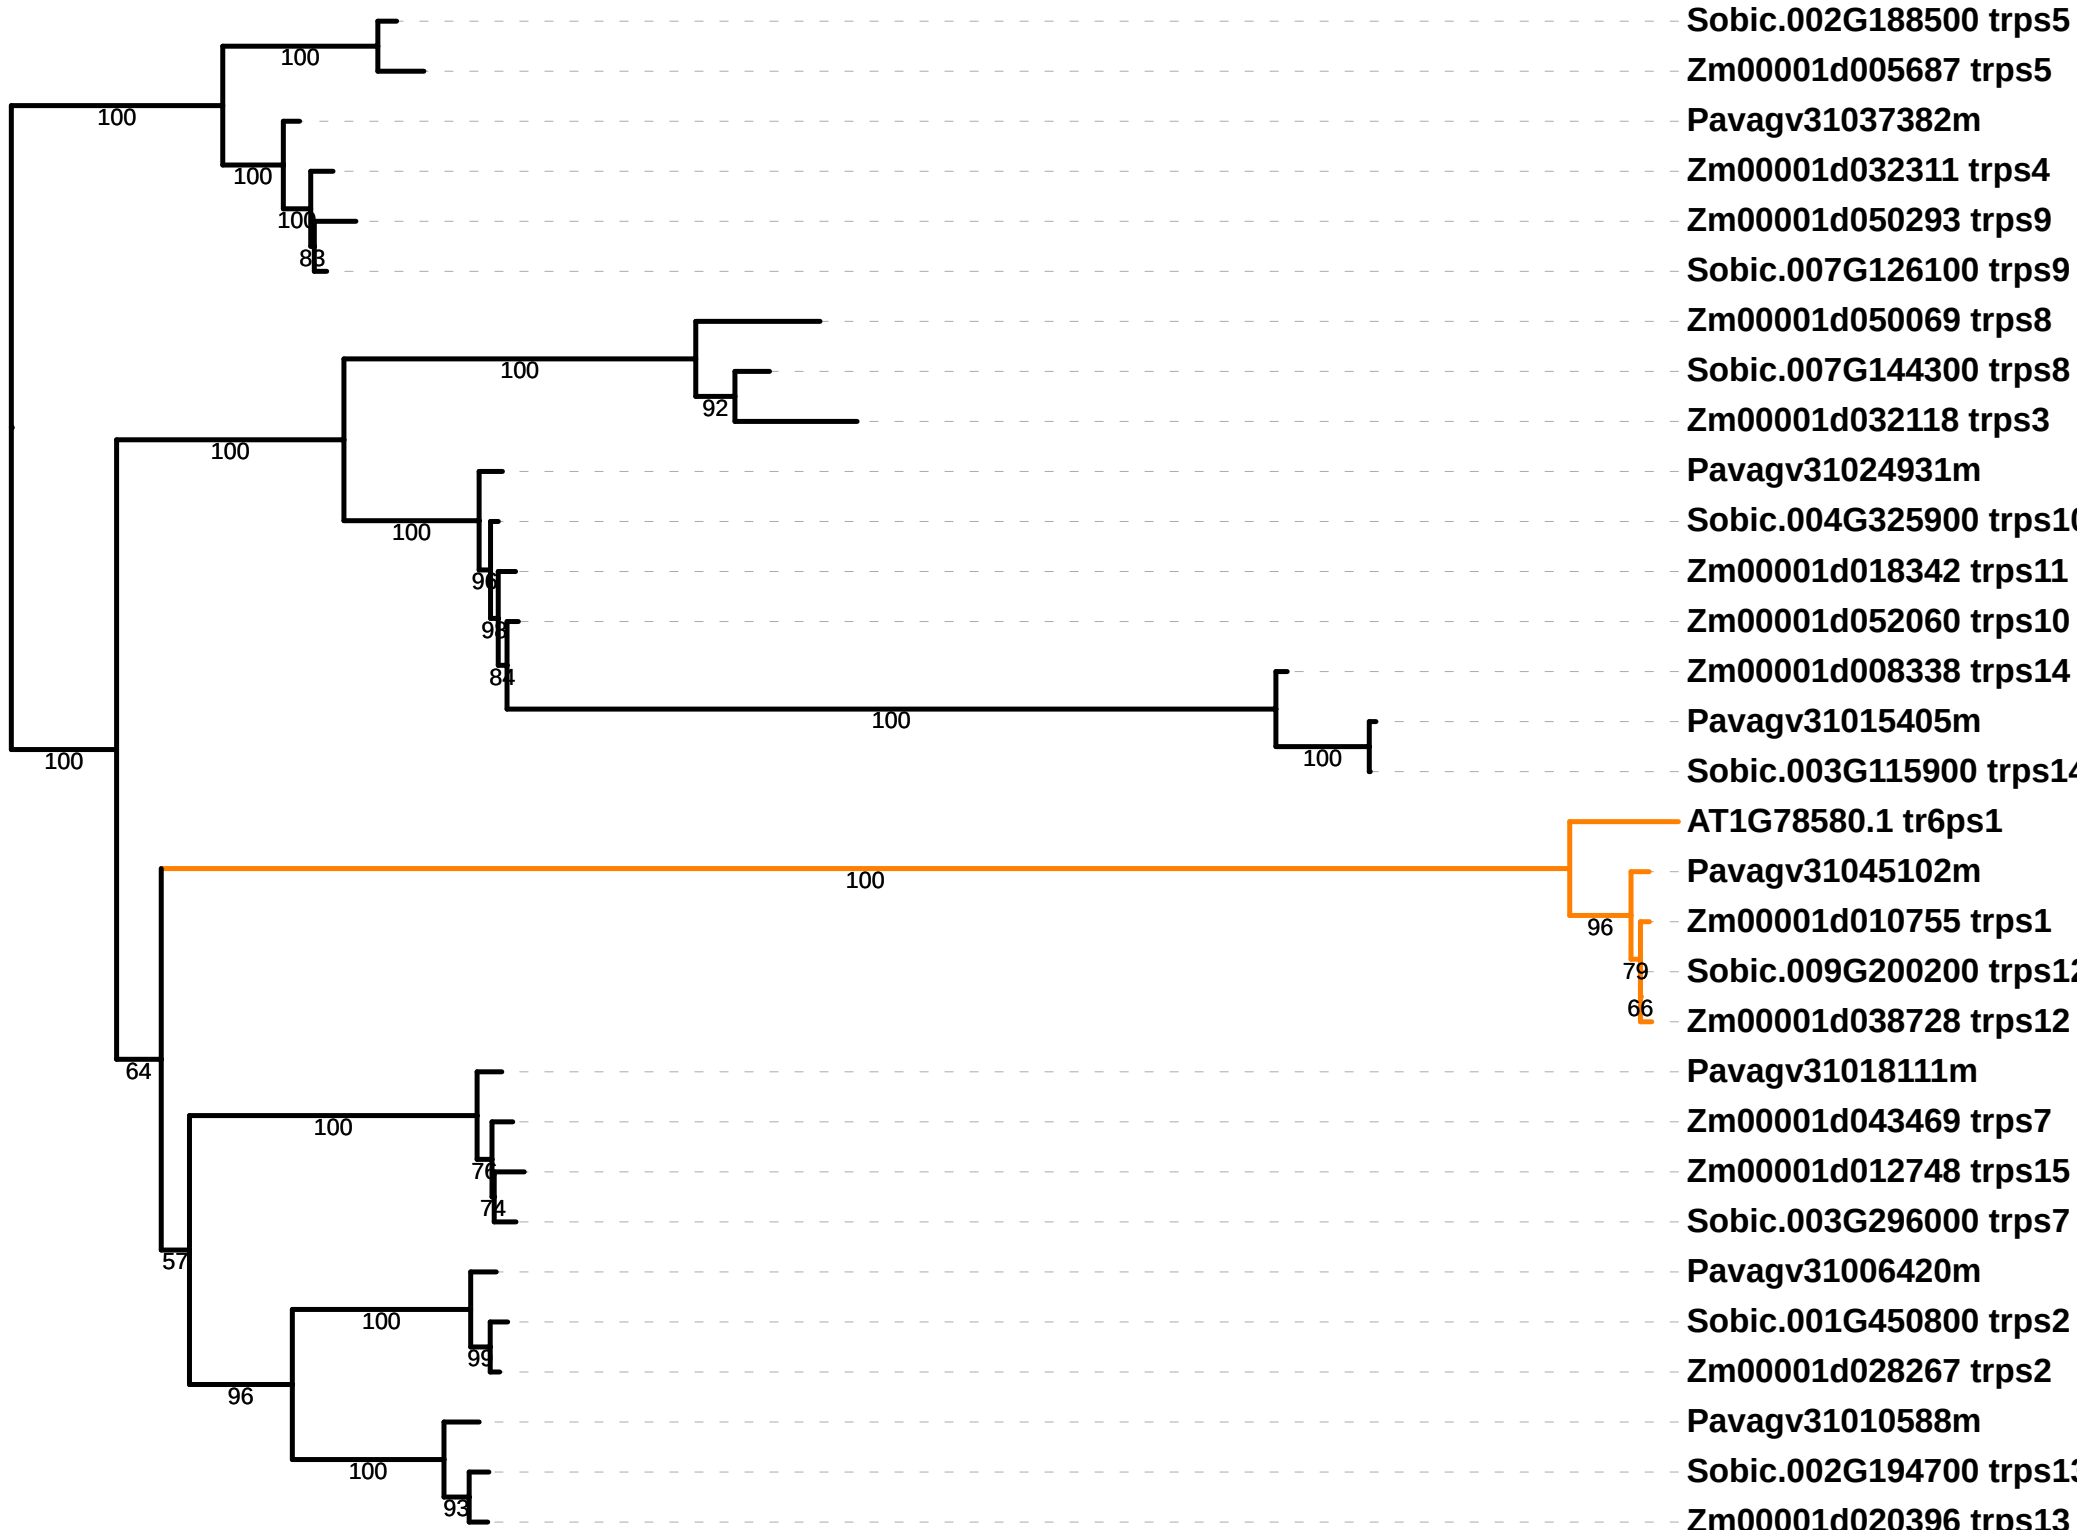

Supplement: Supplementary file [file media-7.pdf]
