# Supplementary material for: The genome of stress tolerant crop wild relative Paspalum vaginatum leads to increased biomass productivity in the crop Zea mays
Source: bioRxiv or medRxiv preprint supplement (doi:10.1101/2021.08.18.456832), 2021-08-19
Supplement: Supplementary file [file media-8.pdf]

## Hoagland\_Nutrient\_Solution\_Protocol

| <b>Hoagland Full nutrient solution (1L)</b>                                                                                                                                             |                                                      |         |                  |                        |                     |
|-----------------------------------------------------------------------------------------------------------------------------------------------------------------------------------------|------------------------------------------------------|---------|------------------|------------------------|---------------------|
| Concentration                                                                                                                                                                           | Chemical                                             | wt(g)/L | For 250 mL Stock | mL/L for working stock | Final Concentration |
| 2M                                                                                                                                                                                      | KNO <sub>3</sub>                                     | 202.2   | 50.55            | 2.5                    | 5 mM                |
| 2M                                                                                                                                                                                      | Ca(NO <sub>3</sub> ) <sub>2</sub> ·4H <sub>2</sub> O | 472.3   | 118.075          | 2.5                    | 5 mM                |
| 1M                                                                                                                                                                                      | KH <sub>2</sub> PO <sub>4</sub> (PH=6)               | 136.09  | 34.0225          | 1                      | 1 mM                |
| 2M                                                                                                                                                                                      | MgSO <sub>4</sub> ·7H <sub>2</sub> O                 | 492.94  | 123.3235         | 1                      | 2 mM                |
| 0.05M                                                                                                                                                                                   | Fe-EDTA*                                             | 2.8     | 0.7              | 1                      | 50 uM               |
|                                                                                                                                                                                         | Micro Nutrients                                      |         |                  | 1                      |                     |
|                                                                                                                                                                                         |                                                      |         | Total            | 9                      |                     |
| <b>*0.05M Fe-EDTA (200ml):</b> 3.72g DETA in 70 mL ddiH <sub>2</sub> O mixed with 2.78 g FeSO <sub>4</sub> ·7H <sub>2</sub> O in 70 mL ddiH <sub>2</sub> O and then volume up to 200 mL |                                                      |         |                  |                        |                     |

| <b>Hoagland -Nitrogen nutrient solution (1L)</b> |                                        |         |                  |                        |                     |
|--------------------------------------------------|----------------------------------------|---------|------------------|------------------------|---------------------|
| Concentration                                    | Chemical                               | wt(g)/L | For 250 mL Stock | mL/L for working stock | Final Concentration |
| 0.5M                                             | KSO <sub>4</sub>                       | 87      | 21.75            | 10                     | 5 mM                |
| 2M                                               | CaCl <sub>2</sub> ·2H <sub>2</sub> O   | 294.02  | 73.505           | 2.5                    | 5 mM                |
| 1M                                               | KH <sub>2</sub> PO <sub>4</sub> (PH=6) | 136.09  | 34.0225          | 1                      | 1 mM                |
| 2M                                               | MgSO <sub>4</sub> ·7H <sub>2</sub> O   | 492.94  | 123.3235         | 1                      | 2 mM                |
| 0.05M                                            | Fe-EDTA*                               | 2.8     | 0.7              | 1                      | 0.1 mM              |
|                                                  | Micro Nutrients                        |         |                  | 1                      |                     |
|                                                  |                                        |         | Total            | 16.5                   |                     |

| <b>Hoagland -Phosphorus nutrient solution (1L)</b> |                                                      |         |                  |                        |                     |
|----------------------------------------------------|------------------------------------------------------|---------|------------------|------------------------|---------------------|
| Concentration                                      | Chemical                                             | wt(g)/L | For 250 mL Stock | mL/L for working stock | Final Concentration |
| 2M                                                 | KNO <sub>3</sub>                                     | 202.2   | 50.55            | 2.5                    | 5 mM                |
| 2M                                                 | Ca(NO <sub>3</sub> ) <sub>2</sub> ·4H <sub>2</sub> O | 472.3   | 118.075          | 2.5                    | 5 mM                |
| 1M                                                 | KSO <sub>4</sub>                                     | 87      | 21.75            | 10                     | 10 mM               |
| 2M                                                 | MgSO <sub>4</sub> ·7H <sub>2</sub> O                 | 492.94  | 123.3235         | 1                      | 2 mM                |
| 0.05M                                              | Fe-EDTA*                                             | 2.8     | 0.7              | 1                      | 0.1 mM              |
|                                                    | Micro Nutrients                                      |         |                  | 1                      |                     |
|                                                    |                                                      |         | Total            | 18                     |                     |

Hoagland\_Nutrient\_Solution\_Protocol

| Micro Nutrients (1L)    |                                                                        |         |
|-------------------------|------------------------------------------------------------------------|---------|
| Final Concentration     | Chemical                                                               | wt(g)/L |
| 0.046M                  | H <sub>3</sub> BO <sub>3</sub> (Boric Acid)                            | 2.86    |
| 0.009M                  | MnCl <sub>2</sub> ·4H <sub>2</sub> O (Manganese Chloride)              | 1.81    |
| 7.5X10 <sup>-4</sup> M  | ZnSO <sub>4</sub> ·7H <sub>2</sub> O (Zinc Sulphate)                   | 0.22    |
| 3.2X10 <sup>-4</sup> M  | CuSO <sub>4</sub> (Copper Sulphate)                                    | 0.08    |
| 1.11X10 <sup>-4</sup> M | H <sub>2</sub> MoO <sub>4</sub> ·4H <sub>2</sub> O (Molybdic Acid 85%) | 0.02    |

| Concentration | Chemical                                             | wt(g)/L | For 250 mL Stock |
|---------------|------------------------------------------------------|---------|------------------|
| 2M            | KNO <sub>3</sub>                                     | 202.2   | 50.55            |
| 2M            | Ca(NO <sub>3</sub> ) <sub>2</sub> ·4H <sub>2</sub> O | 472.3   | 118.075          |
| 1M            | KH <sub>2</sub> PO <sub>4</sub> (PH=6)               | 136.09  | 34.0225          |
| 2M            | MgSO <sub>4</sub> ·7H <sub>2</sub> O                 | 492.94  | 123.3235         |
| 0.05M         | Fe-EDTA*                                             | 2.8     | 0.7              |
| 0.5M          | KNO <sub>3</sub>                                     | 202.2   | 50.55            |
| 2M            | CaCl <sub>2</sub> ·2H <sub>2</sub> O                 | 294.02  | 73.505           |
